# Supplementary material for: Identification of a Novel Ferroptosis-Related Gene Prognostic Signature in Bladder Cancer
Source: Front Oncol. 2021 Sep 7;11:730716. doi: 10.3389/fonc.2021.730716 (PMC8455063; doi:10.3389/fonc.2021.730716)
Supplement: Supplementary 8 — Immunohistochemistry results of SRC in tissue microarray. [file Table_3.xls]

gene	NormalMean	TumorMean	logFC	pValue	fdr
CA9	1.16794411	16.16138285	3.790507504	1.58E-05	6.76E-05
CDKN2A	1.043876203	12.87533964	3.624587957	0.002245112	0.005111212
SCD	8.903545626	62.57525002	2.813140276	4.14E-07	3.10E-06
TFRC	9.576487328	25.18517226	1.395006124	7.99E-05	0.000305409
HMOX1	8.905399069	23.1984724	1.38127764	0.022182255	0.040922437
SLC3A2	13.43395204	32.18718611	1.260602675	6.42E-06	2.98E-05
BID	5.548237065	12.41260046	1.161704057	8.67E-10	2.32E-08
HSPA5	59.27467636	122.1937375	1.043682562	8.41E-07	4.74E-06
SRC	13.08394594	25.98248059	0.989741471	0.000583632	0.001643385
SLC38A1	9.504315609	18.20809631	0.937925444	4.41E-06	2.25E-05
G6PD	14.7296373	27.03609402	0.87616483	0.001799272	0.004375503
MT1G	5.154091276	9.175455717	0.832061727	0.012241691	0.024256685
OTUB1	10.8986356	19.06420835	0.806719088	2.78E-07	2.29E-06
CHAC1	2.674118629	4.671215463	0.804734525	3.45E-09	6.16E-08
NQO1	26.95007513	46.80088	0.796246362	0.008853119	0.018216994
PROM2	18.75931414	32.51124335	0.793331649	0.024722699	0.044088813
FANCD2	3.400256013	5.747033102	0.757173985	2.34E-10	1.92E-08
HELLS	2.981899531	4.510768046	0.597141451	5.39E-10	1.92E-08
LONP1	11.78495814	17.79286115	0.594351885	2.39E-07	2.13E-06
PML	5.963120933	8.942751145	0.584651135	0.001104516	0.002870374
PRDX6	50.24302549	72.21987662	0.523472614	0.016401383	0.030788562
GPX4	55.02420524	78.5185066	0.512966331	0.006578511	0.013801974
PRKAA2	4.03400565	2.850332637	-0.501082811	4.34E-07	3.10E-06
ENPP2	8.926518755	5.748022619	-0.635031911	5.67E-06	2.76E-05
NFE2L2	31.81344046	19.39346032	-0.714066158	1.13E-06	6.05E-06
TNFAIP3	27.64512915	11.69563472	-1.241055154	0.000113354	0.000413727
CAV1	76.10041162	30.4794969	-1.320065168	2.00E-05	8.21E-05
CDKN1A	158.0508942	55.93628987	-1.498532726	0.000262581	0.000832672
ZEB1	12.45151143	4.01032116	-1.634531193	1.93E-07	1.88E-06
PTGS2	50.43308061	12.30839104	-2.034728168	6.42E-07	3.81E-06
ZFP36	677.449869	85.85856113	-2.980080291	4.05E-10	1.92E-08
ATF3	126.2538921	15.80854358	-2.997551498	1.71E-09	3.66E-08
